# Supplementary material for: Live Births After Low Initial β-hCG in IVF Cycles: A Retrospective Cohort Study
Source: Research Square preprint supplement (doi:10.21203/rs.3.rs-8117555/v1), 2025-12-02
Supplement: Supplementary file 1 [file 1af6cd34f0f1690f90261e9a.docx]

**Supplementary material for:**

**Live Births After Low Initial β-hCG in IVF Cycles: A Retrospective Cohort Study**

Sierra DiMarco, BSc, MBS1, Kshitija Mundle, BHSc2, Qixuan Li, MSc3, Ella Huszti, PhD3,4, Daphne Arguelles, BSc5, and Vanessa Bacal, MD, MSc, FRCSC5,6

(1) School of Medicine, Queen’s University, Kingston, Ontario, Canada K7L 3N6 sierra.dimarco@queensu.ca

(2) Michael G. DeGroote School of Medicine, Hamilton, ON, Canada L8P 1H6

(3) Department of Biostatistics, University Health Network, Toronto, ON, Canada M5S 3E3

(4) Institute of Health Policy, Management and Evaluation, University of Toronto, Toronto, ON, Canada M5T 3M6

(5) Mount Sinai Fertility, Mount Sinai Hospital, Toronto, ON, Canada M5T 2Z5

(6) Department of Obstetrics and Gynaecology, University of Toronto, Toronto, ON, Canada M5G 1E2

|  |  |  |  |  |
| --- | --- | --- | --- | --- |
| **Predictor** | **Univariable** | | **Multivariable** | |
|  |  |  |  |  |
|  | **OR** | **95% CI** | **OR** | **95% CI** |
|  |  |  |  |  |
|  |  |  |  |  |
| Initial serum β-hCG above threshold 100.5 mIU/mL | 5.32 | 4.31, 6.58 | 5.18 | 4.14, 6.58 |
|  |  |  |  |  |
| Age at egg retrieval (years) | 0.99 | 0.97, 1.00 | 1.00 | 0.97, 1.02 |
|  |  |  |  |  |
| BMI (kg/m²) | 0.97 | 0.96, 0.99 | 1.01 | 0.99, 1.02 |
|  |  |  |  |  |
| Stage: Blastocyst day 5 (Reference) | 1.00 |  | 1.00 |  |
|  |  |  |  |  |
| Stage: Blastocyst day 6 | 0.76 | 0.63, 0.91 | 0.75 | 0.60, 0.92 |
|  |  |  |  |  |
| Stage: Blastocyst day 7 | 0.26 | 0.09, 0.72 | 0.32 | 0.11, 0.95 |
|  |  |  |  |  |
| Stage: Cleavage | 0.64 | 0.41, 0.99 | 1.22 | 0.74, 2.01 |
|  |  |  |  |  |
| Number of embryos transferred | 0.37 | 0.28, 0.49 | 0.43 | 0.31, 0.61 |
|  |  |  |  |  |
| PGT-A (Yes) | 2.37 | 1.95, 2.89 | 2.26 | 1.78, 2.86 |
|  |  |  |  |  |
|  |  |  |  |  |

Supplementary Table 1. Univariable and multivariable logistic mixed-effects models evaluating predictors of live birth, with initial serum β-hCG dichotomized above the optimal threshold of 100.5 mIU/mL.
